# Supplementary material for: C–C and C–O bond formation reactivity of nickel complexes supported by the pyridinophane MeN3C ligand
Source: Royal Society of Chemistry journal article supplement (doi:10.1039/d5dt00135h), 2025-01-01
Supplement: d5dt00135h1.pdf [file d5dt00135h1.pdf]

## Supporting Information

for

### **C–C and C–O Bond Formation Reactivity of Nickel Complexes Supported by the Pyridinophane<sup>Me</sup>N<sub>3</sub>C Ligand**

Joshua Ji-Nung Leung,<sup>1,‡</sup> Dae Young Bae,<sup>1,‡</sup> Yusuff Moshood,<sup>1,‡</sup> Liviu M. Mirica<sup>1,\*</sup>

Department of Chemistry, University of Illinois at Urbana-Champaign, 600 S. Mathews Avenue,  
Urbana, Illinois, 61801, United States.

\* corresponding author: [mirica@illinois.edu](mailto:mirica@illinois.edu)

‡ these authors contributed equally

#### Table of Contents

|                                           |      |
|-------------------------------------------|------|
| I. General Specifications .....           | S2   |
| II. Experimental Details .....            | S3   |
| III. Reactivity Studies .....             | S8   |
| IV. UV-Vis Spectra.....                   | S11  |
| V. Cyclic Voltammograms .....             | S14  |
| VI. Computational Details .....           | S16  |
| VII. X-ray Structure Determinations ..... | S188 |
| VIII. References.....                     | S38  |

## I. General Specifications

All manipulations are carried out under an inert atmosphere using a nitrogen-filled glovebox or standard Schlenk techniques unless otherwise noted. All reagents for which synthesis is not given are commercially available from Sigma, Acros, STREM, VWR or TCI and were used as received, without further purification. All glassware were oven or flame dried immediately prior to use. Tetrahydrofuran, acetonitrile, n-pentane, and diethyl ether were degassed and dried by passage through a series of drying columns using an MBRAUN SPS. All solvents were stored over 4 Å molecular sieves. Solvents were frequently tested using a standard solution of sodium benzophenone ketyl radical in THF to confirm the absence of trace amounts of water.

NMR spectra were recorded at ambient temperature unless otherwise stated on a Varian 500 MHz instrument.  $^1\text{H}$  NMR chemical shifts are referenced to residual solvent and are reported in parts per million. Magnetic moments were calculated using the Evans method for a known concentration of the metal complex, with a sealed capillary containing the desired solvent.<sup>1-2</sup> EPR spectra were recorded using a Bruker 10" EMXPlus X-band Continuous Wave EPR spectrometer at 77 K. Elemental analysis was carried out by the Microanalysis Laboratory at UIUC using an Exeter Analytical - Model CE440 CHN Analyzer. The geometry index was calculated based on published procedures and represented as tau ( $\tau$ ).<sup>3-4</sup>

Cyclic voltammetry (CV) was performed using a CHI-600D Electrochemical Analyzer. Electrochemical analysis was performed in a standard three-electrode cell using a glassy carbon disk (d=1.6 mm) working electrode, Pt wire counter electrode, and a non-aqueous Ag/AgNO<sub>3</sub> counter electrode. Experiments were conducted with 2.0 mM analyte and 0.1 M <sup>n</sup>Bu<sub>4</sub>NPF<sub>6</sub> (TBAP) as a supporting electrolyte in MeCN under a nitrogen atmosphere. All spectra and values are reported against ferrocene as an external standard.

## II. Experimental Details

The ligands  $^{\text{Me}}\text{N3CBr}$  and  $^{\text{Me}}\text{N3CH}$  were synthesized according to a modified procedure based on previous publications.<sup>5-6</sup>

### Synthesis of 2,6-bis(phthalimidomethyl)pyridine

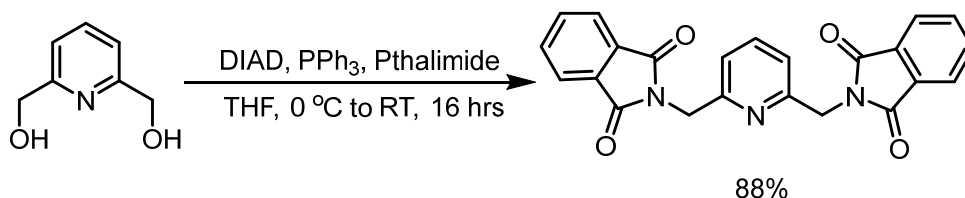

**Scheme S1.** Synthesis of 2,6-bis(phthalimidomethyl)pyridine.

2,6-bis(phthalimidomethyl)pyridine was synthesized according to a modified literature procedure.<sup>7</sup> To a 500-mL round-bottom flask charged with a stir bar, 2,6-bis(hydroxymethyl)pyridine (5.00 g, 35.9 mmol, 1.0 equiv) and triphenylphosphine (19.0 g, 72.4 mmol, 2.0 equiv) were dissolved in THF (300 mL) and cooled to 0 °C. Phthalimide (10.9 g, 74.4 mmol, 1.0 equiv) was added, after which diisopropyl azodicarboxylate ester (15.0 mL, 76.2 mmol, 1.0 equiv) was added dropwise. The mixture was allowed to warm to room temperature and stirred overnight. The crude mixture was filtered, and the solid was taken up in 8:1 DCM:THF (400 mL). The suspension was stirred for 30 minutes, after which the mixture was filtered. The solid was washed with DCM (2 × 25 mL) and dried to yield the product as a white-beige powder (12.4 g, 88%). Spectroscopic characterization matches previously reported values.

### Synthesis of 2,6-bis(4-toluenesulfonylaminoethyl)pyridine

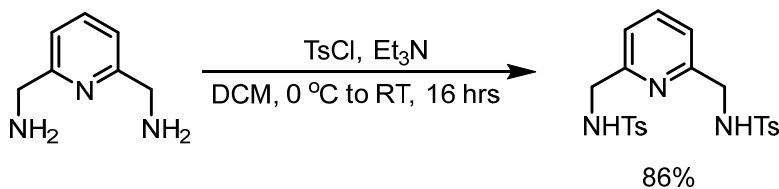

**Scheme S2.** Synthesis of tosyl-protected amine.

2,6-bis(4-toluenesulfonylaminoethyl)pyridine was synthesized according to a modified literature procedure.<sup>6</sup> 2,6-bis(aminomethyl)pyridine (2.00 g, 14.6 mmol) and triethylamine (6.00 mL, 36.5 mmol, 2.5 equiv) were dissolved in DCM (100 mL) and cooled to 0 °C. A solution of 4-

toluenesulfonylchloride (8.34 g, 43.7 mmol, 1.5 equiv) in DCM (150 mL) was added dropwise, after which the mixture was allowed to warm to room temperature and stirred overnight. The mixture was washed with sat. NaHCO<sub>3</sub> solution (100 mL), dried over MgSO<sub>4</sub>, and concentrated by rotary evaporation. The residue was recrystallized in hot ethanol to yield the product as off-white crystals (5.59 g, 86%). Spectroscopic characterization matches previously reported values.

### Synthesis of 3,7-ditosyl-3,7-diaza-1(2,6)-pyridina-5(1,3)-benzenacyclooctaphane (<sup>Me</sup>N<sub>3</sub>CH)

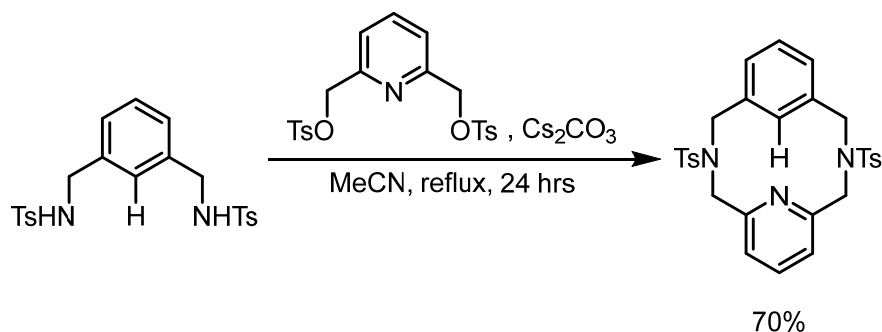

**Scheme S3.** Synthesis of <sup>Me</sup>N<sub>3</sub>CH.

2,6-bis(4-toluenesulfonylamino)benzene (3.8 g, 8.8 mmol, 1.0 equiv) and Cs<sub>2</sub>CO<sub>3</sub> (7.00 g, 21.5 mmol, 2.5 equiv) were dissolved in MeCN (70 mL) and brought to reflux. Once refluxing, a solution of 2,6-bis(tosylmethyl)pyridine (3.94 g, 8.8 mmol, 1.0 equiv) in MeCN (100 mL) was added dropwise. Once addition was complete, the mixture was refluxed for an additional 24 hours. The solution was allowed to cool to room temperature and filtered. The solvent was removed from the filtrate by rotary evaporation, and the residue was recrystallized in chloroform/ethanol to yield the product as tan crystals (3.36 g, 70%). Spectroscopic characterization matches previously reported values.

### Synthesis of <sup>Me</sup>N<sub>3</sub>CBr/<sup>Me</sup>N<sub>3</sub>CH Nickel Complexes

All procedures were as previously reported, with slight modifications in some cases.<sup>8-10 11</sup>

#### <sup>Me</sup>N<sub>3</sub>CNi<sup>II</sup>Br (1)

A solution of <sup>Me</sup>N<sub>3</sub>CBr (54.0 mg, 0.16 mmol, 1.0 equiv) in 2 mL of THF at -35 °C, was added Ni(COD)<sub>2</sub> (41 mg, 0.16 mmol, 1.0 equiv) and the reaction was stirred at room temperature for 6 hours. A filtration was applied to remove the residual black solid. The reaction was concentrated,

and cold pentane was added to crash out the product as a reddish solid. The product was washed with pentane ( $2 \times 1$  mL) and dried under vacuum. This product obtained as red powder was used without further purification due to its air sensitivity (yield: 43.6 mg, 69%). X-Ray quality crystals were grown by slow evaporation of pentane into a concentrated THF solution of the complex. Characterized properties are identical to reported values.<sup>8</sup>

### **[<sup>Me</sup>N<sub>3</sub>CNi<sup>II</sup>(MeCN)<sub>2</sub>][PF<sub>6</sub>] (2)**

To a solution of **1** (50 mg, 0.12 mmol, 1.0 equiv) in 1 mL of CH<sub>3</sub>CN, TIPF<sub>6</sub> (42 mg, 0.12 mmol, 1.0 equiv) was added at RT. The reaction was stirred for 1 hour and the white TIBr precipitate was removed by filtration. The reaction was concentrated to 1 mL under vacuum. To this reaction, 3 mL of Et<sub>2</sub>O was added and the product was crashed out as a brown solid. The product was washed with Et<sub>2</sub>O ( $3 \times 1$  mL) and dried under vacuum. This product was used without further purification due to its air sensitivity and eluded more detailed characterization (yield: 54.8 mg, 81%).

HRMS (ESI+) calc. for C<sub>19</sub>H<sub>23</sub>N<sub>4</sub>Ni<sup>+</sup> [M-CH<sub>3</sub>CN-PF<sub>6</sub>]<sup>+</sup>: 365.1276; found: 365.1331; calc. for C<sub>18</sub>H<sub>20</sub>N<sub>3</sub>Ni<sup>+</sup> [M-2CH<sub>3</sub>CN-PF<sub>6</sub>]<sup>+</sup>: 324.1011; found: 324.1014.

UV-Vis (MeCN):  $\lambda_{\max}$  (nm) ( $\epsilon$ , M<sup>-1</sup> cm<sup>-1</sup>): 267 (3878), 454 (331), 675 (102)

### **[<sup>Me</sup>N<sub>3</sub>CNi<sup>III</sup>Br(MeCN)][PF<sub>6</sub>] (3)**

To a solution of **1** (35 mg, 0.09 mmol, 1.0 equiv) in 1.5 mL MeCN, FcPF<sub>6</sub> (27 mg, 0.09 mmol, 1.0 equiv) was added at RT. A green colored solution developed immediately and the reaction was stirred for additional one hour. The resulting solution filtered to remove any precipitate and the filtrate was concentrated and extracted with dry Et<sub>2</sub>O. The final product obtained as a green powder was washed with Et<sub>2</sub>O ( $5 \times 1$  mL) and dried under vacuum (yield: 43 mg, 84%). Attempt to obtain X-ray quality crystals was unsuccessful.

Elemental analysis for C<sub>21</sub>H<sub>28</sub>BrF<sub>6</sub>N<sub>4</sub>NiP [M•0.5Et<sub>2</sub>O]: calc. C, 40.12; H, 4.46; N, 8.92. Found C, 40.02; H, 4.01; N, 9.06

HRMS (ESI+) calc. for C<sub>17</sub>H<sub>20</sub>N<sub>3</sub>BrNi<sup>+</sup> [M-CH<sub>3</sub>CN-2PF<sub>6</sub>]: 403.0194, found: 403.0186; calc. for C<sub>17</sub>H<sub>20</sub>N<sub>3</sub>Ni<sup>2+</sup> [M-CH<sub>3</sub>CN-Br-2PF<sub>6</sub>]<sup>2+</sup>: 162.0505, found: 162.0510.

UV-Vis (MeCN):  $\lambda_{\max}$  (nm) ( $\epsilon$ , M<sup>-1</sup> cm<sup>-1</sup>): 412 (782), 633 (255)

Evans' method (292 K, CD<sub>3</sub>CN):  $\mu_{\text{eff}} = 1.89 \pm 0.13 \mu_B$

**Me<sub>3</sub>N<sub>3</sub>CNi<sup>III</sup>(Cl)<sub>2</sub> (4)**

To a solution of **3** (62 mg, 0.1 mmol, 1.0 equiv) in 1 mL of CH<sub>3</sub>CN, LiCl (45 mg, 1 mmol, 10 equiv) was added under ambient condition. 4 mL of MeOH was added to dissolve this mixture and the reaction was stirred for 2 hours. The resulting green solution was filtered and concentrated under vacuum. To this concentrated solution, 2 mL of DCM and 2 mL of brine was added. The aqueous phase was collected and extracted with DCM. This organic layer dried with MgSO<sub>4</sub> and concentrated to a green precipitate. This green precipitate was washed with Et<sub>2</sub>O (3 × 1 mL) and dried under vacuum resulting to a green powder (yield: 24 mg, 58%). This green precipitate was dissolved in MeCN and layered with Et<sub>2</sub>O to obtain dark green crystals of X-ray quality after 2 days at RT (yield: 21 mg, 70%) All properties are identical the reported values.<sup>8</sup>

**[Me<sub>3</sub>N<sub>3</sub>CNi<sup>III</sup>(MeCN)<sub>2</sub>][PF<sub>6</sub>]<sub>2</sub> (5)**

To a solution of **3** (25 mg, 0.04 mmol, 1.0 equiv) in 1.5 mL MeCN, AgPF<sub>6</sub> (11 mg, 0.04 mmol, 1.0 equiv) was added at RT. The reaction was stirred for an hour and the formed precipitates were removed by filtration, and the filtrate was layered with Et<sub>2</sub>O. Dark green crystals of X-ray quality formed after 2 days at RT (yield: 21 mg, 70%). Alternatively, using the same procedure with 1 equiv TlPF<sub>6</sub>, the same product was obtained in 66% yield. Also, with complex **1** and 2 equiv AgPF<sub>6</sub>, 68% of product obtained.

Elemental analysis calculated for C<sub>21</sub>H<sub>26</sub>F<sub>12</sub>N<sub>5</sub>NiP<sub>2</sub>: C, 36.18; H, 3.76; N, 10.05. Found: C, 35.90; H, 3.93; N, 10.41.

HRMS (ESI<sup>+</sup>) calc. for C<sub>17</sub>H<sub>20</sub>N<sub>3</sub>Ni<sup>2+</sup> [M-2CH<sub>3</sub>CN-2PF<sub>6</sub>]<sup>2+</sup>: 162.0505, found: 162.0505.

UV-Vis (MeCN): λ<sub>max</sub> (nm) (ε, M<sup>-1</sup> cm<sup>-1</sup>): 258 (4744), 307 (2334), 449 (165), 580 (112), 710 (74).

Evans method (CD<sub>3</sub>CN, 292 K): 1.80 ± 0.18 μB.

**Me<sub>3</sub>N<sub>3</sub>CHNi<sup>II</sup>(Cl)<sub>2</sub>/Me<sub>3</sub>N<sub>3</sub>CHNi<sup>II</sup>(Br)<sub>2</sub> (6a and 6b)**

To a solution of Me<sub>3</sub>N<sub>3</sub>CH (10 mg, 0.075 mmol, 1 equiv) in 2 mL MeCN, NiCl<sub>2</sub>[(CH<sub>2</sub>OCH<sub>3</sub>)<sub>2</sub>] (16.5 mg, 0.075 mmol, 1 equiv) was added at RT. The reaction mixture was stirred at RT overnight, and the resulting green solution was layered with Et<sub>2</sub>O at RT to yield light green crystals of X-ray quality after one day (yield: 13.6 mg, 67%).

Elemental analysis calculated for C<sub>17</sub>H<sub>21</sub>Cl<sub>2</sub>N<sub>3</sub>Ni: C, 51.44; H, 5.33; N, 10.59. Found: C, 50.98; H, 5.29; N, 10.17.

UV-Vis (MeCN):  $\lambda_{\max}$  (nm) ( $\epsilon$ ,  $\text{M}^{-1} \text{cm}^{-1}$ ): 265 (5011), 344 (255), 431 (90), 711 (24)

Evans method (292 K,  $\text{CD}_3\text{CN}$ ):  $3.16 \pm 0.24 \mu_{\text{B}}$ .

Using the same procedure, a solution of  $^{\text{Me}}\text{N}_3\text{CH}$  (60 mg, 0.26 mmol, 1 equiv) in 2 mL THF was added to  $\text{NiBr}_2[(\text{CH}_2\text{OCH}_3)_2]$  (81 mg, 0.26 mmol, 1 equiv) to yield 72.4 mg (67%) of final product.

Elemental analysis calculated for  $\text{C}_{17}\text{H}_{21}\text{Br}_2\text{N}_3\text{Ni}$ : C, 42.02; H, 4.36; N, 8.65. Found: C, 42.17; H, 4.43; N, 8.59.

UV-Vis (MeCN):  $\lambda_{\max}$  (nm) ( $\epsilon$ ,  $\text{M}^{-1} \text{cm}^{-1}$ ): 267 (6861), 364 (640), 433 (73), 654 (46), 707 (40)

Evans method (295 K,  $\text{CD}_3\text{CN}$ ):  $3.12 \pm 0.16 \mu_{\text{B}}$ .

### **$[\text{MeN}_3\text{CHNi}^{\text{II}}(\text{MeCN})_2][\text{PF}_6]_2$ (7)**

To a solution of **6** ( $\text{X}=\text{Br}$ ) (18.5 mg, 0.038 mmol, 1.0 equiv) in 2 mL MeCN,  $\text{TIPF}_6$  (27 mg, 0.076 mmol, 1.0 equiv) was added at RT. The reaction mixture was stirred for an hour, and the resulting purple solution was layered with  $\text{Et}_2\text{O}$  at RT to yield purple crystals of X-ray quality after one day (yield: 22.5 mg, 85%).

Elemental analysis calculated for  $\text{C}_{21}\text{H}_{27}\text{F}_{12}\text{N}_5\text{NiP}_2$ : C, 36.13; H, 3.90; N, 10.03. Found: C, 36.18; H, 3.75; N, 10.63.

UV-Vis (MeCN):  $\lambda_{\max}$  (nm) ( $\epsilon$ ,  $\text{M}^{-1} \text{cm}^{-1}$ ): 268 (5584), 373 (287), 557 (24).

Evans method (295 K,  $\text{CD}_3\text{CN}$ ):  $2.96 \pm 0.18 \mu_{\text{B}}$ .

### III. Reactivity Studies

#### Catalytic 2,2,2-trifluoroethoxylation (Scheme 3 from main text)

The catalytic ethoxylation of  ${}^{\text{Me}}\text{N3CH}$  was performed based on the procedure reported by Ribas et. al, with minor modifications.<sup>12</sup> For reactions using the nickel precursors, additional  ${}^{\text{Me}}\text{N3CH}$  was added to maintain the overall amount of substrate. Yields and conversions are reported with respect to a 1,3,5-trimethoxybenzene internal standard.

**Table S1.** Comparison of different Ni complexes and precursors.

| Complex                                                   | Name                                                                             | Mol % | Yield (%) | Conversion (%) |
|-----------------------------------------------------------|----------------------------------------------------------------------------------|-------|-----------|----------------|
| <b>2</b>                                                  | $[(^{\text{Me}}\text{N3C})\text{Ni}^{\text{II}}(\text{MeCN})_2](\text{PF}_6)_2$  | 30    | 27        | 29             |
| <b>6b</b>                                                 | $(^{\text{Me}}\text{N3CH})\text{Ni}^{\text{II}}\text{Br}_2$                      | 30    | 25        | 31             |
| <b>6b</b>                                                 | $(^{\text{Me}}\text{N3CH})\text{Ni}^{\text{II}}\text{Br}_2$                      | 100   | 12        | 46             |
| <b>7</b>                                                  | $[(^{\text{Me}}\text{N3CH})\text{Ni}^{\text{II}}(\text{MeCN})_2](\text{PF}_6)_2$ | 20    | 27        | 29             |
| <b>7</b>                                                  | $[(^{\text{Me}}\text{N3CH})\text{Ni}^{\text{II}}(\text{MeCN})_2](\text{PF}_6)_2$ | 30    | 49        | >99            |
| <b>NiBr<sub>2</sub>(dme)</b>                              | –                                                                                | 30    | 24        | 67             |
| <b>[Ni(MeCN)<sub>2</sub>](BF<sub>4</sub>)<sub>2</sub></b> | –                                                                                | 30    | 29        | 53             |



### C–C bond formation reactions (Scheme 4 from main text)

In a 4-mL vial charged with a stir bar under N<sub>2</sub> atmosphere, the Ni complex (5 μmol, 1.0 equiv) was dissolved in 2 mL THF. 2M octyl magnesium chloride in THF was added in one shot, and the reaction was stirred at room temperature. Under air, the reactions were quenched by either sat. NH<sub>4</sub>Cl solution or conc. HCl and extracted with Et<sub>2</sub>O (2 × 1 mL). The organic layers are combined, dried over MgSO<sub>4</sub>, filtered through Celite, and analyzed by GC-FID using dodecane as an internal standard.

**Table S2.** Reaction conditions for reactivity with OctMgCl.

| Entry          | Complex        | Equiv<br>OctMgCl | Reaction Time | Workup             |
|----------------|----------------|------------------|---------------|--------------------|
| 1 <sup>a</sup> | 1              | 1.0              | 1 h           | NH <sub>4</sub> Cl |
| 2 <sup>a</sup> | 3              | 1.0              | 1 h           | NH <sub>4</sub> Cl |
| 3 <sup>a</sup> | 7 <sup>b</sup> | 1.0              | 1 h           | NH <sub>4</sub> Cl |
| 4              | 1              | 1.2              | 2 h           | NH <sub>4</sub> Cl |
| 5              | 1              | 1.2              | 2 h           | HCl                |
| 6              | 1              | 2.0              | 2 h           | NH <sub>4</sub> Cl |
| 7              | 3              | 1.2              | 2 h           | NH <sub>4</sub> Cl |
| 8              | 3              | 1.2              | 2 h           | HCl                |
| 9              | 3              | 2.0              | 2 h           | NH <sub>4</sub> Cl |
| 10             | 4 <sup>c</sup> | 1.2              | 2 h           | NH <sub>4</sub> Cl |

<sup>a</sup> The organic layer was filtered through silica instead of Celite.

<sup>b</sup> [(<sup>Me</sup>N3CH)Ni<sup>II</sup>(MeCN)<sub>2</sub>](PF<sub>6</sub>)<sub>2</sub>

<sup>c</sup> (<sup>Me</sup>N3C)Ni<sup>III</sup>Cl<sub>2</sub>

**Table S3.** Detection of various products, as detected by GC-FID.

| <b>Entry</b> | <b>A (%)</b> | <b>B (%)</b> | <b>C (%)</b> | <b>D (%)</b> | <b>E (%)</b> | <b>A : E</b> | <b>A+C : E</b> |
|--------------|--------------|--------------|--------------|--------------|--------------|--------------|----------------|
| <b>1</b>     | 2            | <1           | <1           | 18           | 41           | 0.053        | 0.053          |
| <b>2</b>     | 7            | <1           | 6            | 25           | 31           | 0.22         | 0.42           |
| <b>3</b>     | 1            | <1           | 9            | 24           | 29           | 0.038        | 0.34           |
| <b>4</b>     | 9 ± 2        | 43 ± 2       | <1           | 28 ± 5       | 37 ± 2       | 0.24 ± 0.06  | 0.24 ± 0.06    |
| <b>5</b>     | <1           | 1            | <1           | 32           | 39           | –            | –              |
| <b>6</b>     | 11           | 13           | <1           | 41           | 49           | 0.22         | 0.22           |
| <b>7</b>     | 33 ± 7       | 53 ± 13      | 3 ± 1        | 16 ± 7       | 21 ± 7       | 1.6 ± 0.6    | 1.7 ± 0.6      |
| <b>8</b>     | 1            | 2            | 3            | 24           | 30           | 0.037        | 0.15           |
| <b>9</b>     | 32           | 32           | 4            | 37           | 50           | 0.62         | 0.71           |
| <b>10</b>    | 22           | 74           | 1            | 33           | 40           | 0.56         | 0.59           |

#### IV. UV-Vis Spectra

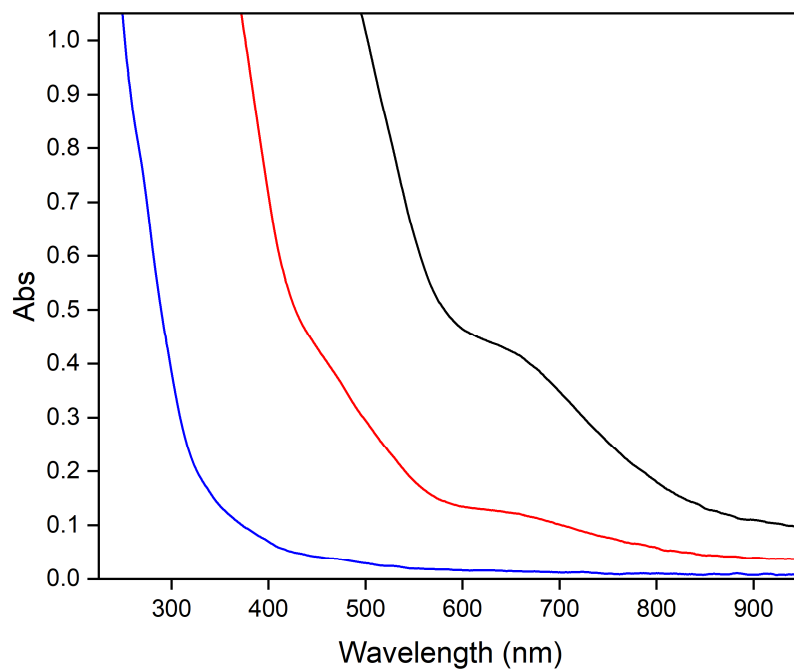

**Figure S1.** UV-Vis spectra of **2** collected at 4.0 mM (black), 1.5 mM (red), and 0.2 mM (blue)

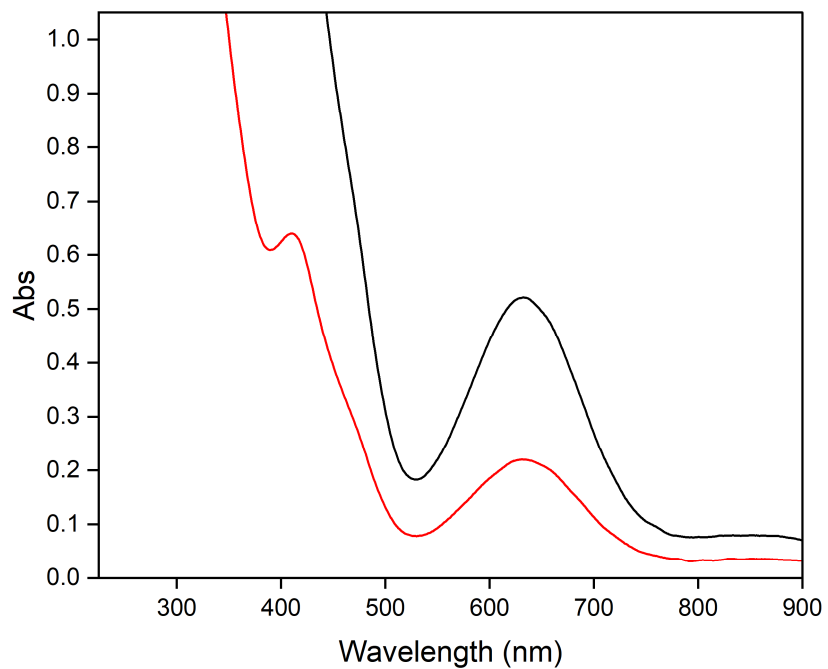

**Figure S2.** UV-Vis spectra of **3** collected at 2.0 mM (black) and 0.8 mM (red)

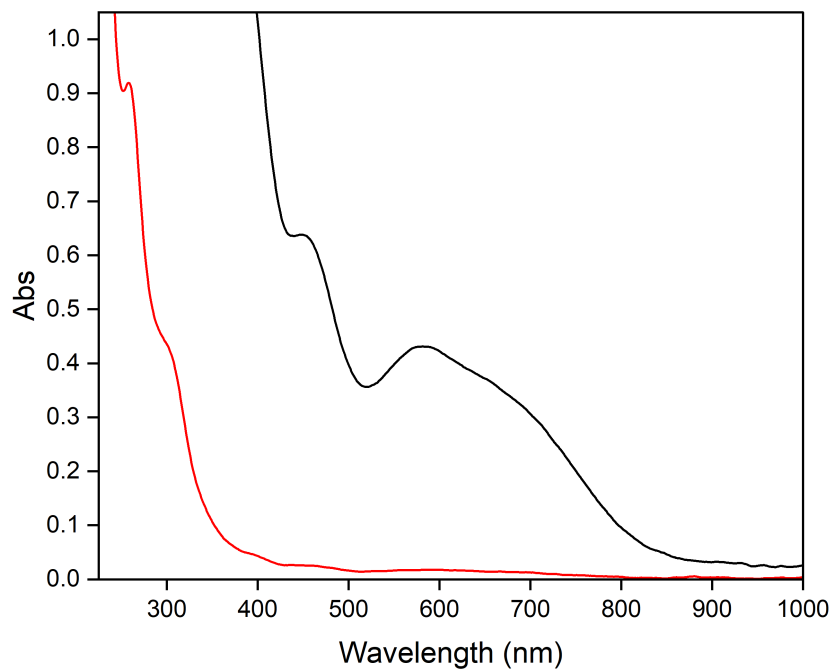

**Figure S3.** UV-Vis spectra of **5** collected at 4.0 mM (black) and 0.2 mM (red)

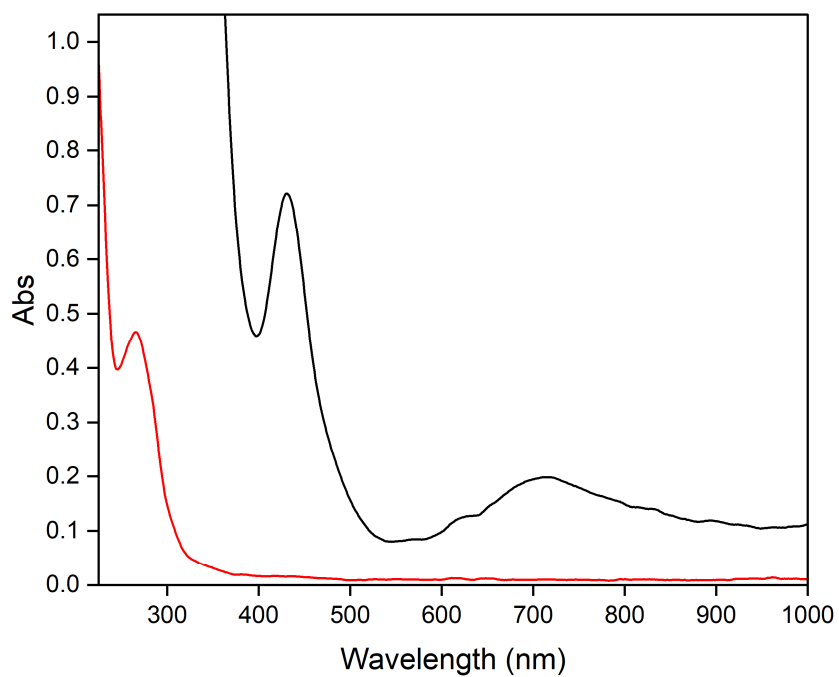

**Figure S4.** UV-Vis spectra of **6a** collected at 8.0 mM (black) and 0.1 mM (red)

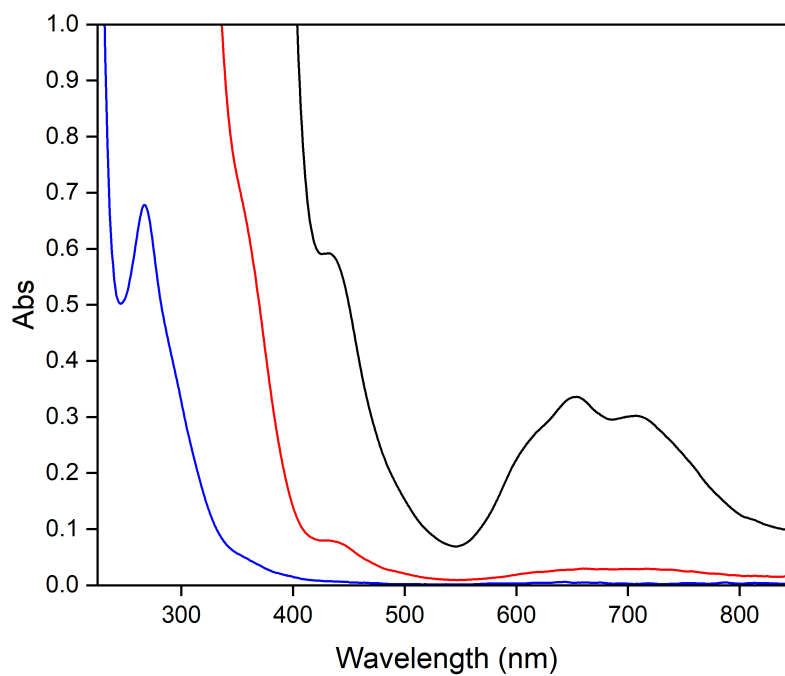

**Figure S5.** UV-Vis spectra of **6b** collected at 8.0 mM (black), 1.0 mM (red), and 0.1 mM (blue)

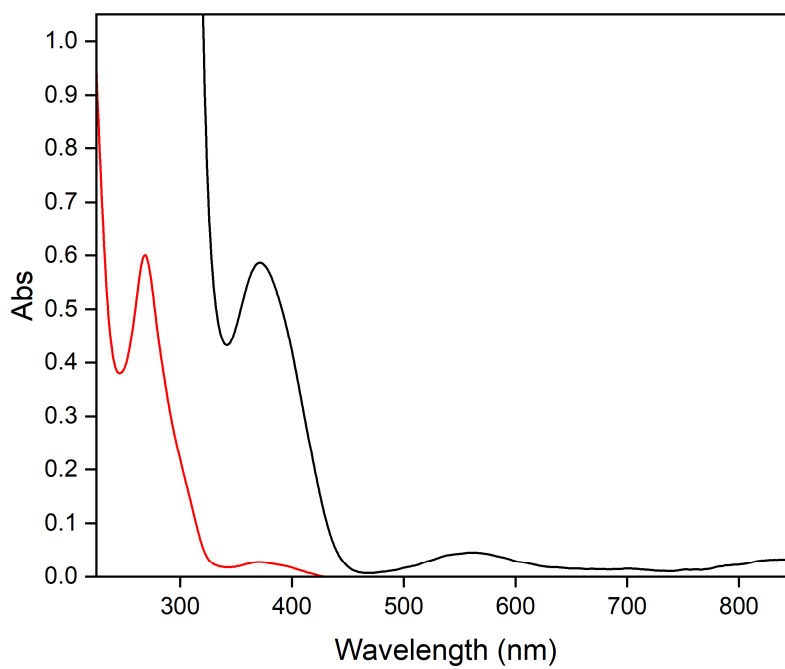

**Figure S6.** UV-Vis Spectra of **7** collected at 2.0 mM (black) and 0.1 mM (red)

## V. Cyclic Voltammograms

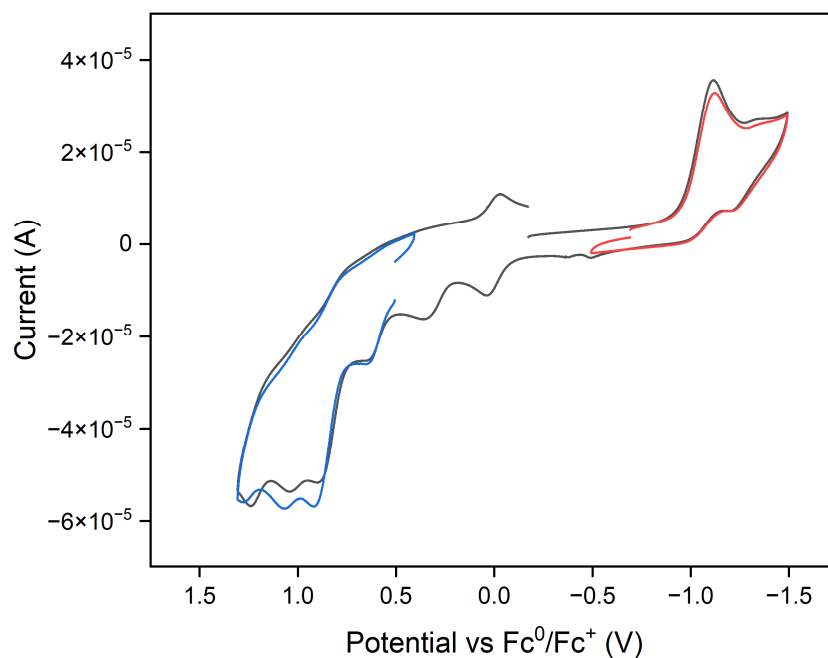

**Figure S7.** Cyclic voltammogram of **3**, recorded at 100 mV/s.

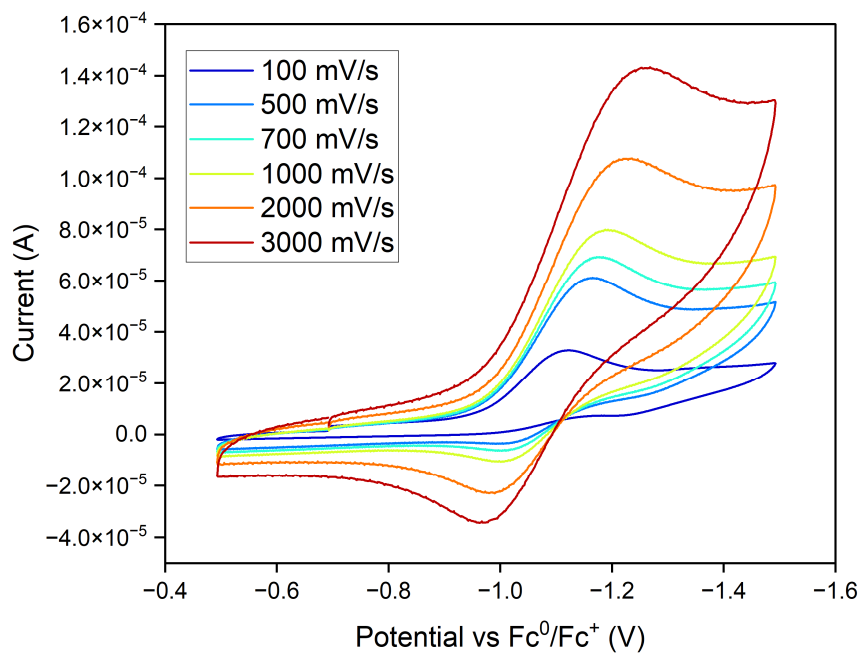

**Figure S8.** Cyclic voltammogram of reduction event at  $-1.2$  V for **3**. Growth of a reverse wave at higher scans indicates quasi-reversibility.

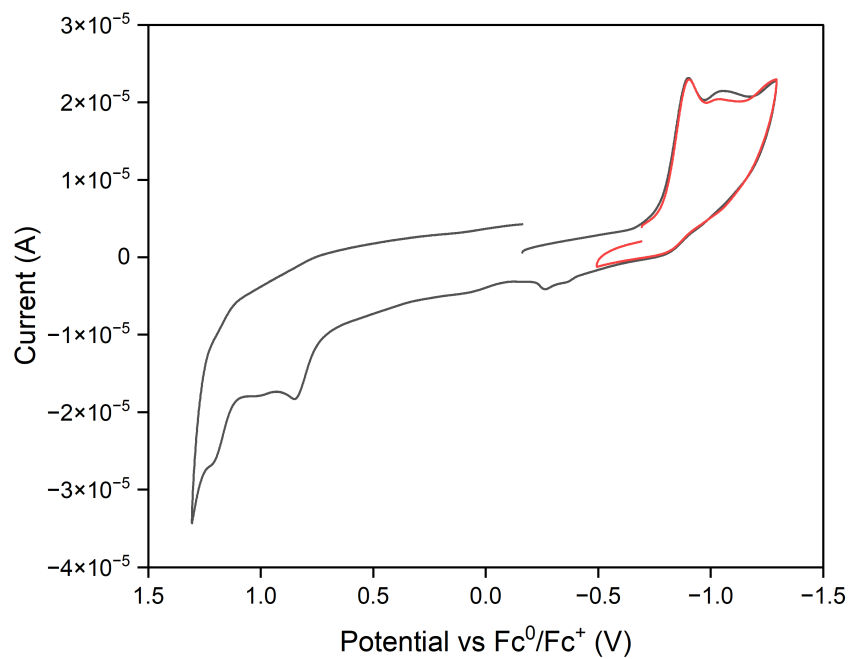

**Figure S9.** Cyclic voltammogram of **5**, recorded at 100 mV/s.

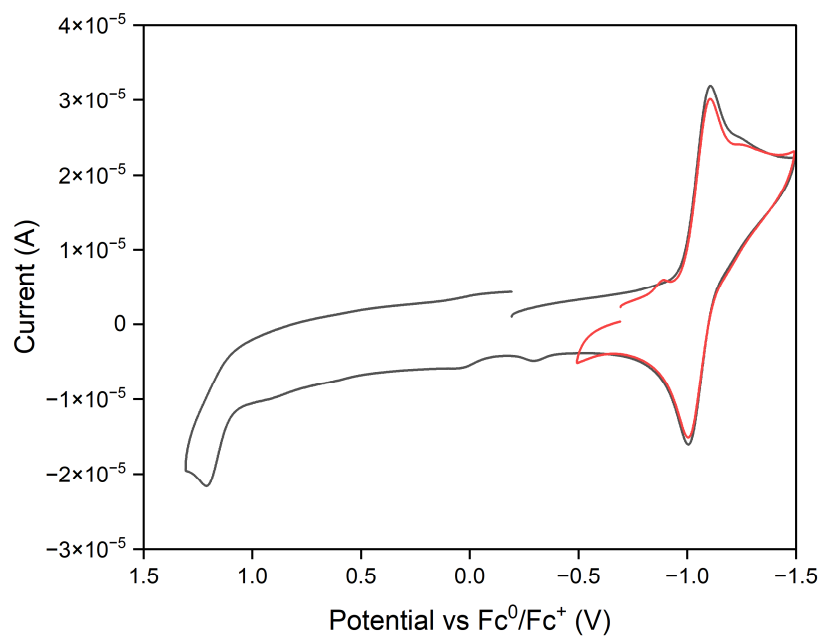

**Figure S10.** Cyclic voltammogram of **7**, recorded at 100 mV/s.

## VI. Computational Details

The molecular structures were optimized using B3LYP<sup>13-14</sup> density functional combined with def2-TZVPP<sup>15-16</sup> basis set. The nature of local minima was confirmed by checking the Hessian matrix of energy. All DFT computations were performed by Gaussian 16 Rev. C1 suite of programs.<sup>17</sup> The Natural Bond Orbital (NBO) analysis results for complex **6b** is shown below.

**Table S4.** NBO analysis of **6b**, for both the alpha and beta spins; the average energies are reported in the main text.

| Spin State | Donor   | Atomic orbital                                  | Type     | $q_i$   | Acceptor | Atomic orbital                                                 | Type       | $q_i$   | E(2)<br>kcal/mol | E(j)-E(i)<br>a.u | F(i,j) |
|------------|---------|-------------------------------------------------|----------|---------|----------|----------------------------------------------------------------|------------|---------|------------------|------------------|--------|
| $\alpha$   | C17—H37 | C17 sp <sup>2.5</sup><br>H37 s                  | $\sigma$ | 0.98537 | Ni44     | s(99.48%)<br>p0.00( 0.24%)<br>d 0.00(0.29%)<br>f 0.00( 0.00%)  | LV         | 0.17552 | 2.08             | 0.53             | 0.042  |
|            | Br40    | s( 0.02%)<br>p 99.99 (99.95%)<br>d 0.00( 0.03%) | LP       | 0.98407 | C17—H37  | C 17 sp <sup>2.5</sup><br>H 37 s                               | $\sigma^*$ | 0.02354 | 2.62             | 0.67             | 0.053  |
| $\beta$    | C17—H37 | C17 sp <sup>2.47</sup><br>H37 s                 | $\sigma$ | 0.97110 | Ni44     | s(17.09%)<br>p 0.02(0.24%)<br>d 4.83(82.62%)<br>f 0.00( 0.00%) | LV         | 0.11397 | 2.43             | 0.52             | 0.045  |
|            | Br40    | s( 7.18%)<br>p12.92 (92.79%)<br>d 0.00( 0.03%)  | LP       | 0.97675 | C17—H37  | C 17 sp <sup>2.47</sup><br>H 37 s                              | $\sigma^*$ | 0.02368 | 3.58             | 0.70             | 0.70   |

### Coordinates of optimized structure **6b**

Charge= 0; Multiplicity= 3;  
 Br -0.947161 0.336282 12.28504  
 Ni 0.125606 2.411249 11.527005  
 N 0.656376 4.323539 11.010112  
 N 0.550963 3.406129 13.615631  
 N -1.058752 2.74484 9.525839  
 C 0.435362 4.743217 9.765481  
 C 1.276514 5.089897 11.90579  
 C -2.474526 4.219453 10.941251  
 C -1.116944 1.500718 8.734683  
 C -1.595817 4.579508 13.176143  
 C -0.70685 3.952325 14.222264  
 C 1.516976 4.463842 13.260239  
 C -2.448971 3.23907 9.793927



C 1.171381 2.439161 14.541295  
C -2.043871 3.734762 12.169187  
C -0.221125 3.746797 8.838141  
C 1.742079 6.351673 11.559425  
C 0.873672 5.993556 9.34938  
C -1.828128 5.945825 13.043657  
C 1.541403 6.800331 10.260945  
C -2.433693 6.435814 11.88738  
C -2.704228 5.586836 10.81512  
Br 2.337232 1.636698 10.782492  
H -0.106 1.127373 8.58785  
H -1.593878 1.662436 7.759827  
H -1.672852 0.753002 9.294476  
H -1.216447 3.104582 14.678373  
H -0.457256 4.664153 15.018184  
H 2.500813 3.992664 13.209908  
H 1.566402 5.240643 14.032885  
H -2.870524 3.676473 8.881026  
H -3.039499 2.359735 10.047753  
H 0.469825 1.630034 14.727389  
H 1.452353 2.910469 15.491515  
H 2.055111 2.015344 14.069728  
H -1.960327 2.65985 12.309724  
H -0.781204 4.270652 8.054109  
H 0.589815 3.202093 8.350097  
H 2.247046 6.967212 12.290883  
H 0.693362 6.326333 8.336632  
H -1.510961 6.632729 13.818666  
H 1.894982 7.778534 9.963496  
H -2.627155 7.496142 11.792604  
H -3.060104 5.998023 9.878445

## VII. X-ray Structure Determinations

### General information.

Crystallographic data for the structures reported in this article have been deposited at the Cambridge Crystallographic Data Centre, under CCDC deposition numbers 2390120, 2390122-2390125. Crystals were mounted on a Bruker D8 Venture kappa diffractometer equipped with a Photon II CPAD detector. An I $\mu$ s microfocus Mo source ( $\lambda = 0.71073 \text{ \AA}$ ) coupled with a multi-layer mirror monochromator provided the incident beam. The sample was mounted on a nylon loop with the minimal amount of Paratone-N oil. Data was collected as a series of  $\phi$  and/or  $\omega$  scans at 100 K using a cold stream of N<sub>2</sub> (g). The collection, cell refinement, and integration of intensity data was carried out with the APEXIII software.<sup>18</sup> A multiscan absorption correction was performed with SADABS or TWINABS-2012/1.<sup>18</sup> The structure was phased with intrinsic methods using SHELXT and refined with the full-matrix least squares program SHELXL.<sup>19</sup> Hydrogen atoms were placed in calculated positions using the standard riding model and refined isotropically; all non-hydrogen atoms were refined anisotropically. Software and solutions: SAINT V8.38A, SHELXT, XL, Olex2.<sup>19-21</sup>

## X-ray structure determination of [(<sup>Me</sup>N<sub>3</sub>C)Ni<sup>II</sup>Br (1)

**Table S5.** Crystal data and structure refinement for **1**.

|                                             |                                                               |
|---------------------------------------------|---------------------------------------------------------------|
| Identification code                         | 1                                                             |
| Empirical formula                           | C <sub>17</sub> H <sub>20</sub> BrN <sub>3</sub> Ni           |
| Formula weight                              | 404.98                                                        |
| Temperature/K                               | 100.00                                                        |
| Crystal system                              | tetragonal                                                    |
| Space group                                 | P4 <sub>3</sub>                                               |
| a/Å                                         | 9.3768(8)                                                     |
| b/Å                                         | 9.3768(8)                                                     |
| c/Å                                         | 18.877(2)                                                     |
| α/°                                         | 90                                                            |
| β/°                                         | 90                                                            |
| γ/°                                         | 90                                                            |
| Volume/Å <sup>3</sup>                       | 1659.8(3)                                                     |
| Z                                           | 4                                                             |
| ρ <sub>calc</sub> /cm <sup>3</sup>          | 1.621                                                         |
| μ/mm <sup>-1</sup>                          | 3.576                                                         |
| F(000)                                      | 824.0                                                         |
| Crystal size/mm <sup>3</sup>                | 0.317 × 0.14 × 0.034                                          |
| Radiation                                   | MoKα (λ = 0.71073)                                            |
| 2θ range for data collection/°              | 4.344 to 50.656                                               |
| Index ranges                                | -11 ≤ h ≤ 11, -9 ≤ k ≤ 11, -22 ≤ l ≤ 22                       |
| Reflections collected                       | 13329                                                         |
| Independent reflections                     | 3016 [R <sub>int</sub> = 0.0707, R <sub>sigma</sub> = 0.0614] |
| Data/restraints/parameters                  | 3016/1/201                                                    |
| Goodness-of-fit on F <sup>2</sup>           | 1.068                                                         |
| Final R indexes [I ≥ 2σ (I)]                | R <sub>1</sub> = 0.0464, wR <sub>2</sub> = 0.1003             |
| Final R indexes [all data]                  | R <sub>1</sub> = 0.0552, wR <sub>2</sub> = 0.1034             |
| Largest diff. peak/hole / e Å <sup>-3</sup> | 0.54/-0.49                                                    |
| Flack parameter                             | 0.007(15)                                                     |

**Table S6.** Bond Lengths for **1**.

| <b>Atom Atom Length/Å</b> |     |            | <b>Atom Atom Length/Å</b> |     |           |
|---------------------------|-----|------------|---------------------------|-----|-----------|
| Br1                       | Ni1 | 2.3724(15) | C2                        | C4  | 1.392(14) |
| Ni1                       | N2  | 1.981(8)   | C8                        | C7  | 1.523(13) |
| Ni1                       | N1  | 2.292(7)   | C8                        | N3  | 1.502(13) |
| Ni1                       | C1  | 1.954(9)   | C7                        | C1  | 1.382(12) |
| Ni1                       | N3  | 2.276(7)   | C7                        | C6  | 1.361(14) |
| C3                        | C2  | 1.520(13)  | C9                        | C10 | 1.499(13) |
| C3                        | N1  | 1.489(12)  | C9                        | C11 | 1.391(14) |
| N2                        | C9  | 1.353(12)  | N1                        | C16 | 1.461(12) |
| N2                        | C14 | 1.338(12)  | N1                        | C10 | 1.461(13) |
| C15                       | N3  | 1.488(13)  | C5                        | C4  | 1.388(13) |
| C15                       | C14 | 1.507(14)  | C5                        | C6  | 1.373(14) |
| C13                       | C14 | 1.383(14)  | N3                        | C17 | 1.493(12) |
| C13                       | C12 | 1.378(16)  | C11                       | C12 | 1.379(15) |
| C2                        | C1  | 1.381(13)  |                           |     |           |

**Table S7.** Bond Angles for **1**.

| <b>Atom</b> | <b>Atom</b> | <b>Atom</b> | <b>Angle/°</b> | <b>Atom</b> | <b>Atom</b> | <b>Atom</b> | <b>Angle/°</b> |
|-------------|-------------|-------------|----------------|-------------|-------------|-------------|----------------|
| N2          | Ni1         | Br1         | 133.1(2)       | C11         | C9          | C10         | 124.5(9)       |
| N2          | Ni1         | N1          | 80.2(3)        | C3          | N1          | Ni1         | 105.0(5)       |
| N2          | Ni1         | N3          | 80.6(3)        | C16         | N1          | Ni1         | 117.4(6)       |
| N1          | Ni1         | Br1         | 101.5(2)       | C16         | N1          | C3          | 110.4(7)       |
| C1          | Ni1         | Br1         | 140.3(3)       | C10         | N1          | Ni1         | 102.7(5)       |
| C1          | Ni1         | N2          | 86.6(3)        | C10         | N1          | C3          | 111.3(8)       |
| C1          | Ni1         | N1          | 81.8(3)        | C10         | N1          | C16         | 109.7(8)       |
| C1          | Ni1         | N3          | 81.2(3)        | C6          | C5          | C4          | 119.8(10)      |
| N3          | Ni1         | Br1         | 103.4(2)       | C2          | C1          | Ni1         | 117.6(7)       |
| N3          | Ni1         | N1          | 154.9(3)       | C2          | C1          | C7          | 118.6(9)       |
| N1          | C3          | C2          | 112.8(7)       | C7          | C1          | Ni1         | 118.5(6)       |
| C9          | N2          | Ni1         | 117.4(6)       | C15         | N3          | Ni1         | 105.0(6)       |
| C14         | N2          | Ni1         | 118.2(7)       | C15         | N3          | C8          | 111.8(8)       |
| C14         | N2          | C9          | 120.1(8)       | C15         | N3          | C17         | 108.2(7)       |
| N3          | C15         | C14         | 112.6(7)       | C8          | N3          | Ni1         | 103.3(5)       |
| C12         | C13         | C14         | 118.6(10)      | C17         | N3          | Ni1         | 118.8(6)       |
| C1          | C2          | C3          | 116.1(8)       | C17         | N3          | C8          | 109.6(8)       |
| C1          | C2          | C4          | 120.8(9)       | C5          | C4          | C2          | 119.0(9)       |
| C4          | C2          | C3          | 123.1(8)       | N1          | C10         | C9          | 111.8(8)       |
| N3          | C8          | C7          | 110.7(7)       | C12         | C11         | C9          | 118.9(10)      |
| C1          | C7          | C8          | 114.0(8)       | C7          | C6          | C5          | 120.8(9)       |
| C6          | C7          | C8          | 125.1(8)       | N2          | C14         | C15         | 115.7(9)       |
| C6          | C7          | C1          | 120.8(8)       | N2          | C14         | C13         | 121.7(9)       |
| N2          | C9          | C10         | 115.0(8)       | C13         | C14         | C15         | 122.5(9)       |
| N2          | C9          | C11         | 120.5(9)       | C13         | C12         | C11         | 120.1(10)      |

**X-ray structure determination of [(<sup>Me</sup>N3C)Ni<sup>III</sup>(MeCN)<sub>2</sub>](PF<sub>6</sub>)<sub>2</sub> (5)****Table S8.** Crystal data and structural refinement for 5.

|                                             |                                                                                 |
|---------------------------------------------|---------------------------------------------------------------------------------|
| Identification code                         | mo_ed01t_0m                                                                     |
| Empirical formula                           | C <sub>23</sub> H <sub>29</sub> F <sub>12</sub> N <sub>6</sub> NiP <sub>2</sub> |
| Formula weight                              | 738.17                                                                          |
| Temperature/K                               | 100.00                                                                          |
| Crystal system                              | monoclinic                                                                      |
| Space group                                 | P2 <sub>1</sub> /c                                                              |
| a/Å                                         | 10.2675(3)                                                                      |
| b/Å                                         | 18.8199(5)                                                                      |
| c/Å                                         | 15.6377(4)                                                                      |
| α/°                                         | 90                                                                              |
| β/°                                         | 97.2359(8)                                                                      |
| γ/°                                         | 90                                                                              |
| Volume/Å <sup>3</sup>                       | 2997.66(14)                                                                     |
| Z                                           | 4                                                                               |
| ρ <sub>calc</sub> /cm <sup>3</sup>          | 1.636                                                                           |
| μ/mm <sup>-1</sup>                          | 0.855                                                                           |
| F(000)                                      | 1500.0                                                                          |
| Crystal size/mm <sup>3</sup>                | 0.572 × 0.152 × 0.044                                                           |
| Radiation                                   | MoKα (λ = 0.71073)                                                              |
| 2θ range for data collection/°              | 3.998 to 52.818                                                                 |
| Index ranges                                | -12 ≤ h ≤ 12, -23 ≤ k ≤ 23, -19 ≤ l ≤ 19                                        |
| Reflections collected                       | 72080                                                                           |
| Independent reflections                     | 6147 [R <sub>int</sub> = 0.0337, R <sub>sigma</sub> = 0.0157]                   |
| Data/restraints/parameters                  | 6147/0/402                                                                      |
| Goodness-of-fit on F <sup>2</sup>           | 1.045                                                                           |
| Final R indexes [I ≥ 2σ (I)]                | R <sub>1</sub> = 0.0353, wR <sub>2</sub> = 0.0855                               |
| Final R indexes [all data]                  | R <sub>1</sub> = 0.0383, wR <sub>2</sub> = 0.0872                               |
| Largest diff. peak/hole / e Å <sup>-3</sup> | 0.63/-0.51                                                                      |

**Table S9.** Bond lengths for **5**.

| <b>Atom</b> | <b>Atom</b> | <b>Length/Å</b> | <b>Atom</b> | <b>Atom</b> | <b>Length/Å</b> |
|-------------|-------------|-----------------|-------------|-------------|-----------------|
| Ni1         | N1          | 1.9351(18)      | N3          | C7          | 1.501(3)        |
| Ni1         | N2          | 2.1519(18)      | N3          | C8          | 1.492(3)        |
| Ni1         | N3          | 2.1417(18)      | N3          | C17         | 1.486(3)        |
| Ni1         | N4          | 1.9825(18)      | N4          | C18         | 1.133(3)        |
| Ni1         | N5          | 1.9899(18)      | N5          | C20         | 1.139(3)        |
| Ni1         | C1          | 1.921(2)        | N6          | C22         | 1.136(4)        |
| P1          | F1          | 1.6017(14)      | C1          | C2          | 1.365(3)        |
| P1          | F2          | 1.5973(15)      | C1          | C6          | 1.359(3)        |
| P1          | F3          | 1.6031(14)      | C2          | C3          | 1.392(4)        |
| P1          | F4          | 1.6005(15)      | C2          | C15         | 1.496(4)        |
| P1          | F5          | 1.5949(14)      | C3          | C4          | 1.393(4)        |
| P1          | F6          | 1.5971(14)      | C4          | C5          | 1.386(4)        |
| P2          | F7          | 1.5859(18)      | C5          | C6          | 1.392(3)        |
| P2          | F8          | 1.5990(15)      | C6          | C7          | 1.493(3)        |
| P2          | F9          | 1.574(2)        | C8          | C9          | 1.502(3)        |
| P2          | F10         | 1.5861(17)      | C9          | C10         | 1.382(3)        |
| P2          | F11         | 1.578(2)        | C10         | C11         | 1.386(4)        |
| P2          | F12         | 1.6030(18)      | C11         | C12         | 1.389(3)        |
| N1          | C9          | 1.345(3)        | C12         | C13         | 1.389(3)        |
| N1          | C13         | 1.346(3)        | C13         | C14         | 1.502(3)        |
| N2          | C14         | 1.491(3)        | C18         | C19         | 1.457(3)        |
| N2          | C15         | 1.493(3)        | C20         | C21         | 1.451(3)        |
| N2          | C16         | 1.486(3)        | C22         | C23         | 1.440(4)        |

**Table S10.** Bond angles for **5**.

| Atom | Atom | Atom | Angle/°    | Atom | Atom | Atom | Angle/°    |
|------|------|------|------------|------|------|------|------------|
| N1   | Ni1  | N2   | 82.38(7)   | C9   | N1   | Ni1  | 118.04(15) |
| N1   | Ni1  | N3   | 82.10(7)   | C9   | N1   | C13  | 122.89(19) |
| N1   | Ni1  | N4   | 176.36(8)  | C13  | N1   | Ni1  | 119.01(15) |
| N1   | Ni1  | N5   | 91.99(8)   | C14  | N2   | Ni1  | 107.54(13) |
| N3   | Ni1  | N2   | 159.40(7)  | C14  | N2   | C15  | 111.4(2)   |
| N4   | Ni1  | N2   | 97.51(7)   | C15  | N2   | Ni1  | 105.46(14) |
| N4   | Ni1  | N3   | 97.12(7)   | C16  | N2   | Ni1  | 113.72(15) |
| N4   | Ni1  | N5   | 91.63(7)   | C16  | N2   | C14  | 109.2(2)   |
| N5   | Ni1  | N2   | 98.42(7)   | C16  | N2   | C15  | 109.42(18) |
| N5   | Ni1  | N3   | 95.58(7)   | C7   | N3   | Ni1  | 108.58(13) |
| C1   | Ni1  | N1   | 85.46(8)   | C8   | N3   | Ni1  | 104.81(13) |
| C1   | Ni1  | N2   | 82.59(9)   | C8   | N3   | C7   | 111.46(16) |
| C1   | Ni1  | N3   | 82.75(8)   | C17  | N3   | Ni1  | 114.63(13) |
| C1   | Ni1  | N4   | 90.92(8)   | C17  | N3   | C7   | 108.94(17) |
| C1   | Ni1  | N5   | 177.11(8)  | C17  | N3   | C8   | 108.40(17) |
| F1   | P1   | F3   | 179.29(9)  | C18  | N4   | Ni1  | 174.38(18) |
| F2   | P1   | F1   | 90.43(8)   | C20  | N5   | Ni1  | 175.46(18) |
| F2   | P1   | F3   | 90.13(9)   | C2   | C1   | Ni1  | 116.49(17) |
| F2   | P1   | F4   | 179.49(10) | C6   | C1   | Ni1  | 117.75(16) |
| F4   | P1   | F1   | 90.08(8)   | C6   | C1   | C2   | 125.7(2)   |
| F4   | P1   | F3   | 89.36(8)   | C1   | C2   | C3   | 116.6(2)   |
| F5   | P1   | F1   | 90.86(8)   | C1   | C2   | C15  | 116.8(2)   |
| F5   | P1   | F2   | 89.89(9)   | C3   | C2   | C15  | 126.3(2)   |
| F5   | P1   | F3   | 89.58(8)   | C2   | C3   | C4   | 119.9(2)   |
| F5   | P1   | F4   | 90.16(8)   | C5   | C4   | C3   | 121.0(2)   |
| F5   | P1   | F6   | 179.85(10) | C4   | C5   | C6   | 119.4(3)   |
| F6   | P1   | F1   | 89.20(8)   | C1   | C6   | C5   | 117.4(2)   |
| F6   | P1   | F2   | 89.97(9)   | C1   | C6   | C7   | 117.81(19) |
| F6   | P1   | F3   | 90.36(8)   | C5   | C6   | C7   | 124.5(2)   |
| F6   | P1   | F4   | 89.98(9)   | C6   | C7   | N3   | 110.76(18) |
| F7   | P2   | F8   | 89.82(10)  | N3   | C8   | C9   | 111.32(17) |
| F7   | P2   | F10  | 89.98(11)  | N1   | C9   | C8   | 114.62(18) |
| F7   | P2   | F12  | 87.68(11)  | N1   | C9   | C10  | 119.8(2)   |
| F8   | P2   | F12  | 90.19(9)   | C10  | C9   | C8   | 125.4(2)   |
| F9   | P2   | F7   | 176.27(15) | C9   | C10  | C11  | 118.7(2)   |



| <b>Atom</b> | <b>Atom</b> | <b>Atom</b> | <b>Angle/°</b> | <b>Atom</b> | <b>Atom</b> | <b>Atom</b> | <b>Angle/°</b> |
|-------------|-------------|-------------|----------------|-------------|-------------|-------------|----------------|
| F9          | P2          | F8          | 88.63(11)      | C10         | C11         | C12         | 120.6(2)       |
| F9          | P2          | F10         | 91.52(12)      | C11         | C12         | C13         | 118.8(2)       |
| F9          | P2          | F11         | 93.02(16)      | N1          | C13         | C12         | 119.2(2)       |
| F9          | P2          | F12         | 88.93(13)      | N1          | C13         | C14         | 115.7(2)       |
| F10         | P2          | F8          | 179.06(11)     | C12         | C13         | C14         | 124.9(2)       |
| F10         | P2          | F12         | 88.89(10)      | N2          | C14         | C13         | 112.8(2)       |
| F11         | P2          | F7          | 90.33(14)      | N2          | C15         | C2          | 109.68(18)     |
| F11         | P2          | F8          | 88.59(10)      | N4          | C18         | C19         | 178.7(2)       |
| F11         | P2          | F10         | 92.33(11)      | N5          | C20         | C21         | 179.2(2)       |
| F11         | P2          | F12         | 177.67(13)     | N6          | C22         | C23         | 178.4(5)       |

## X-ray structure determination of (<sup>Me</sup>N<sub>3</sub>CH)Ni<sup>II</sup>Cl<sub>2</sub> (**6a**)

**Table S11.** Crystal data and structural refinement for **6a**.

|                                             |                                                                   |
|---------------------------------------------|-------------------------------------------------------------------|
| Identification code                         | mo_ed45x                                                          |
| Empirical formula                           | C <sub>19</sub> H <sub>24</sub> Cl <sub>2</sub> N <sub>4</sub> Ni |
| Formula weight                              | 438.03                                                            |
| Temperature/K                               | 100.00                                                            |
| Crystal system                              | orthorhombic                                                      |
| Space group                                 | Pca2 <sub>1</sub>                                                 |
| a/Å                                         | 15.6090(4)                                                        |
| b/Å                                         | 8.7670(2)                                                         |
| c/Å                                         | 14.6494(3)                                                        |
| α/°                                         | 90                                                                |
| β/°                                         | 90                                                                |
| γ/°                                         | 90                                                                |
| Volume/Å <sup>3</sup>                       | 2004.68(8)                                                        |
| Z                                           | 4                                                                 |
| ρ <sub>calc</sub> /cm <sup>3</sup>          | 1.451                                                             |
| μ/mm <sup>-1</sup>                          | 1.245                                                             |
| F(000)                                      | 912.0                                                             |
| Crystal size/mm <sup>3</sup>                | 0.838 × 0.42 × 0.368                                              |
| Radiation                                   | MoKα (λ = 0.71073)                                                |
| 2θ range for data collection/°              | 4.646 to 56.622                                                   |
| Index ranges                                | -20 ≤ h ≤ 20, -11 ≤ k ≤ 11, -19 ≤ l ≤ 19                          |
| Reflections collected                       | 33927                                                             |
| Independent reflections                     | 4996 [R <sub>int</sub> = 0.0254, R <sub>sigma</sub> = 0.0159]     |
| Data/restraints/parameters                  | 4996/1/250                                                        |
| Goodness-of-fit on F <sup>2</sup>           | 1.072                                                             |
| Final R indexes [I ≥ 2σ (I)]                | R <sub>1</sub> = 0.0188, wR <sub>2</sub> = 0.0475                 |
| Final R indexes [all data]                  | R <sub>1</sub> = 0.0191, wR <sub>2</sub> = 0.0477                 |
| Largest diff. peak/hole / e Å <sup>-3</sup> | 0.27/-0.26                                                        |
| Flack parameter                             | 0.007(5)                                                          |

**Table S12.** Bond lengths for **6a**.

| <b>Atom</b> | <b>Atom</b> | <b>Length/Å</b> | <b>Atom</b> | <b>Atom</b> | <b>Length/Å</b> |
|-------------|-------------|-----------------|-------------|-------------|-----------------|
| Ni1         | C12         | 2.3288(5)       | C6          | C7          | 1.502(3)        |
| Ni1         | C11         | 2.3115(6)       | C1          | C2          | 1.390(3)        |
| Ni1         | N1          | 1.9926(17)      | C9          | C8          | 1.511(3)        |
| Ni1         | N2          | 2.2329(17)      | C9          | C10         | 1.387(3)        |
| Ni1         | N3          | 2.2418(16)      | C14         | C13         | 1.504(3)        |
| N1          | C9          | 1.336(3)        | C5          | C4          | 1.392(3)        |
| N1          | C13         | 1.343(3)        | C13         | C12         | 1.390(3)        |
| N2          | C16         | 1.477(3)        | C4          | C3          | 1.394(3)        |
| N2          | C14         | 1.485(2)        | C12         | C11         | 1.388(3)        |
| N2          | C15         | 1.509(3)        | C11         | C10         | 1.394(3)        |
| N3          | C8          | 1.484(3)        | C2          | C3          | 1.391(3)        |
| N3          | C17         | 1.481(3)        | C2          | C15         | 1.511(3)        |
| N3          | C7          | 1.510(3)        | N4          | C19         | 1.136(3)        |
| C6          | C1          | 1.395(3)        | C18         | C19         | 1.463(3)        |
| C6          | C5          | 1.393(3)        |             |             |                 |

**Table S13.** Bond angles for **6a**.

| Atom | Atom | Atom | Angle/°    | Atom | Atom | Atom | Angle/°    |
|------|------|------|------------|------|------|------|------------|
| C11  | Ni1  | Cl2  | 97.16(2)   | C1   | C6   | C7   | 115.52(19) |
| N1   | Ni1  | Cl2  | 91.33(5)   | C5   | C6   | C1   | 118.6(2)   |
| N1   | Ni1  | Cl1  | 171.51(5)  | C5   | C6   | C7   | 124.4(2)   |
| N1   | Ni1  | N2   | 79.30(6)   | C2   | C1   | C6   | 121.4(2)   |
| N1   | Ni1  | N3   | 79.98(7)   | N1   | C9   | C8   | 115.18(18) |
| N2   | Ni1  | Cl2  | 102.49(5)  | N1   | C9   | C10  | 121.05(19) |
| N2   | Ni1  | Cl1  | 98.96(5)   | C10  | C9   | C8   | 123.69(18) |
| N2   | Ni1  | N3   | 147.74(6)  | N2   | C14  | C13  | 112.19(16) |
| N3   | Ni1  | Cl2  | 102.46(4)  | C4   | C5   | C6   | 120.0(2)   |
| N3   | Ni1  | Cl1  | 97.89(5)   | N1   | C13  | C14  | 114.35(17) |
| C9   | N1   | Ni1  | 119.41(14) | N1   | C13  | C12  | 120.79(19) |
| C9   | N1   | C13  | 121.37(17) | C12  | C13  | C14  | 124.77(18) |
| C13  | N1   | Ni1  | 119.16(14) | N3   | C8   | C9   | 113.28(16) |
| C16  | N2   | Ni1  | 113.30(13) | C5   | C4   | C3   | 120.2(2)   |
| C16  | N2   | C14  | 109.11(17) | C11  | C12  | C13  | 118.23(19) |
| C16  | N2   | C15  | 108.83(16) | C12  | C11  | C10  | 120.38(19) |
| C14  | N2   | Ni1  | 103.68(12) | C9   | C10  | C11  | 118.15(19) |
| C14  | N2   | C15  | 110.81(17) | C1   | C2   | C3   | 118.7(2)   |
| C15  | N2   | Ni1  | 111.02(13) | C1   | C2   | C15  | 115.34(19) |
| C8   | N3   | Ni1  | 104.54(12) | C3   | C2   | C15  | 124.8(2)   |
| C8   | N3   | C7   | 110.49(17) | C2   | C3   | C4   | 120.0(2)   |
| C17  | N3   | Ni1  | 113.05(13) | N2   | C15  | C2   | 108.84(16) |
| C17  | N3   | C8   | 109.37(17) | C6   | C7   | N3   | 107.36(16) |
| C17  | N3   | C7   | 108.69(17) | N4   | C19  | C18  | 178.6(3)   |
| C7   | N3   | Ni1  | 110.65(12) |      |      |      |            |

## X-ray structure determination of (<sup>Me</sup>N<sub>3</sub>CH)Ni<sup>II</sup>Br<sub>2</sub> (**6b**)

**Table S14.** Crystal data and structural refinement for **6b**.

|                                             |                                                                   |
|---------------------------------------------|-------------------------------------------------------------------|
| Identification code                         | mo_ED53W_0m                                                       |
| Empirical formula                           | C <sub>17</sub> H <sub>21</sub> Br <sub>2</sub> N <sub>3</sub> Ni |
| Formula weight                              | 485.90                                                            |
| Temperature/K                               | 100.00                                                            |
| Crystal system                              | orthorhombic                                                      |
| Space group                                 | Pbca                                                              |
| a/Å                                         | 12.8864(3)                                                        |
| b/Å                                         | 15.0143(3)                                                        |
| c/Å                                         | 18.1804(4)                                                        |
| α/°                                         | 90                                                                |
| β/°                                         | 90                                                                |
| γ/°                                         | 90                                                                |
| Volume/Å <sup>3</sup>                       | 3517.55(13)                                                       |
| Z                                           | 8                                                                 |
| ρ <sub>calc</sub> /cm <sup>3</sup>          | 1.835                                                             |
| μ/mm <sup>-1</sup>                          | 5.649                                                             |
| F(000)                                      | 1936.0                                                            |
| Crystal size/mm <sup>3</sup>                | 0.318 × 0.27 × 0.142                                              |
| Radiation                                   | MoKα (λ = 0.71073)                                                |
| 2θ range for data collection/°              | 4.48 to 56.67                                                     |
| Index ranges                                | -17 ≤ h ≤ 17, -20 ≤ k ≤ 20, -24 ≤ l ≤ 24                          |
| Reflections collected                       | 97734                                                             |
| Independent reflections                     | 4382 [R <sub>int</sub> = 0.0446, R <sub>sigma</sub> = 0.0135]     |
| Data/restraints/parameters                  | 4382/0/215                                                        |
| Goodness-of-fit on F <sup>2</sup>           | 1.028                                                             |
| Final R indexes [I ≥ 2σ (I)]                | R <sub>1</sub> = 0.0172, wR <sub>2</sub> = 0.0408                 |
| Final R indexes [all data]                  | R <sub>1</sub> = 0.0201, wR <sub>2</sub> = 0.0420                 |
| Largest diff. peak/hole / e Å <sup>-3</sup> | 0.54/-0.32                                                        |

**Table S15.** Bond lengths for **6b**.

| <b>Atom</b> | <b>Atom</b> | <b>Length/Å</b> | <b>Atom</b> | <b>Atom</b> | <b>Length/Å</b> |
|-------------|-------------|-----------------|-------------|-------------|-----------------|
| Br1         | Ni1         | 2.4546(2)       | C17         | C6          | 1.511(2)        |
| Ni1         | N3          | 1.9850(13)      | C17         | C16         | 1.385(2)        |
| Ni1         | N1          | 2.2232(13)      | C13         | C4          | 1.506(2)        |
| Ni1         | N2          | 2.2548(13)      | C13         | C14         | 1.389(2)        |
| Ni1         | C8          | 2.4819(15)      | C7          | C5          | 1.505(2)        |
| Ni1         | Br2         | 2.4782(2)       | C7          | C8          | 1.390(2)        |
| N3          | C17         | 1.3397(19)      | C7          | C12         | 1.397(2)        |
| N3          | C13         | 1.3403(19)      | C9          | C3          | 1.507(2)        |
| N1          | C3          | 1.5078(19)      | C9          | C8          | 1.389(2)        |
| N1          | C4          | 1.4912(19)      | C9          | C10         | 1.394(2)        |
| N1          | C2          | 1.4819(19)      | C14         | C15         | 1.388(2)        |
| N2          | C1          | 1.4825(19)      | C16         | C15         | 1.393(2)        |
| N2          | C5          | 1.5068(19)      | C10         | C11         | 1.395(2)        |
| N2          | C6          | 1.4880(19)      | C11         | C12         | 1.397(2)        |

**Table S16.** Bond angles for **6b**.

| Atom | Atom | Atom | Angle/°    | Atom | Atom | Atom | Angle/°    |
|------|------|------|------------|------|------|------|------------|
| Br1  | Ni1  | C8   | 91.86(4)   | C6   | N2   | Ni1  | 104.30(9)  |
| Br1  | Ni1  | Br2  | 97.680(8)  | C6   | N2   | C5   | 110.70(12) |
| N3   | Ni1  | Br1  | 173.61(4)  | N3   | C17  | C6   | 115.13(13) |
| N3   | Ni1  | N1   | 80.10(5)   | N3   | C17  | C16  | 120.84(14) |
| N3   | Ni1  | N2   | 79.64(5)   | C16  | C17  | C6   | 123.87(14) |
| N3   | Ni1  | C8   | 81.90(5)   | N3   | C13  | C4   | 114.90(13) |
| N3   | Ni1  | Br2  | 88.65(4)   | N3   | C13  | C14  | 120.87(14) |
| N1   | Ni1  | Br1  | 99.87(3)   | C14  | C13  | C4   | 124.04(13) |
| N1   | Ni1  | N2   | 148.65(5)  | C8   | C7   | C5   | 115.37(14) |
| N1   | Ni1  | C8   | 76.68(5)   | C8   | C7   | C12  | 118.43(14) |
| N1   | Ni1  | Br2  | 97.29(3)   | C12  | C7   | C5   | 125.16(14) |
| N2   | Ni1  | Br1  | 97.68(3)   | C8   | C9   | C3   | 115.06(14) |
| N2   | Ni1  | C8   | 76.98(5)   | C8   | C9   | C10  | 119.10(14) |
| N2   | Ni1  | Br2  | 105.87(3)  | C10  | C9   | C3   | 125.10(14) |
| Br2  | Ni1  | C8   | 169.52(4)  | C9   | C3   | N1   | 108.67(12) |
| C17  | N3   | Ni1  | 119.93(10) | N1   | C4   | C13  | 112.81(12) |
| C17  | N3   | C13  | 121.32(13) | C7   | C5   | N2   | 109.08(12) |
| C13  | N3   | Ni1  | 118.69(10) | C7   | C8   | Ni1  | 101.48(10) |
| C3   | N1   | Ni1  | 111.52(9)  | C9   | C8   | Ni1  | 101.06(9)  |
| C4   | N1   | Ni1  | 103.49(9)  | C9   | C8   | C7   | 121.75(15) |
| C4   | N1   | C3   | 110.06(12) | N2   | C6   | C17  | 113.55(12) |
| C2   | N1   | Ni1  | 113.36(9)  | C15  | C14  | C13  | 118.34(14) |
| C2   | N1   | C3   | 108.93(12) | C17  | C16  | C15  | 118.47(14) |
| C2   | N1   | C4   | 109.35(12) | C9   | C10  | C11  | 118.97(15) |
| C1   | N2   | Ni1  | 115.38(10) | C14  | C15  | C16  | 120.16(14) |
| C1   | N2   | C5   | 107.86(12) | C10  | C11  | C12  | 121.23(15) |
| C1   | N2   | C6   | 109.12(12) | C7   | C12  | C11  | 119.37(15) |
| C5   | N2   | Ni1  | 109.46(9)  |      |      |      |            |

**X-ray structure determination of [(<sup>Me</sup>N<sub>3</sub>CH)Ni<sup>II</sup>(MeCN)<sub>2</sub>](PF<sub>6</sub>)<sub>2</sub> (7)****Table S17.** Crystal data and structural refinement for 7.

|                                             |                                                                                 |
|---------------------------------------------|---------------------------------------------------------------------------------|
| Identification code                         | mo_ed36x_0m                                                                     |
| Empirical formula                           | C <sub>23</sub> H <sub>30</sub> F <sub>12</sub> N <sub>6</sub> NiP <sub>2</sub> |
| Formula weight                              | 739.18                                                                          |
| Temperature/K                               | 100.00                                                                          |
| Crystal system                              | triclinic                                                                       |
| Space group                                 | P-1                                                                             |
| a/Å                                         | 13.2054(4)                                                                      |
| b/Å                                         | 13.5806(4)                                                                      |
| c/Å                                         | 17.2734(5)                                                                      |
| α/°                                         | 88.4600(10)                                                                     |
| β/°                                         | 89.9270(10)                                                                     |
| γ/°                                         | 80.0500(10)                                                                     |
| Volume/Å <sup>3</sup>                       | 3050.05(16)                                                                     |
| Z                                           | 4                                                                               |
| ρ <sub>calc</sub> /cm <sup>3</sup>          | 1.610                                                                           |
| μ/mm <sup>-1</sup>                          | 0.840                                                                           |
| F(000)                                      | 1504.0                                                                          |
| Crystal size/mm <sup>3</sup>                | 0.561 × 0.311 × 0.26                                                            |
| Radiation                                   | MoKα (λ = 0.71073)                                                              |
| 2θ range for data collection/°              | 3.802 to 52.868                                                                 |
| Index ranges                                | -16 ≤ h ≤ 16, -16 ≤ k ≤ 17, -21 ≤ l ≤ 21                                        |
| Reflections collected                       | 168081                                                                          |
| Independent reflections                     | 12529 [R <sub>int</sub> = 0.0372, R <sub>sigma</sub> = 0.0147]                  |
| Data/restraints/parameters                  | 12529/0/803                                                                     |
| Goodness-of-fit on F <sup>2</sup>           | 1.034                                                                           |
| Final R indexes [I ≥ 2σ (I)]                | R <sub>1</sub> = 0.0461, wR <sub>2</sub> = 0.1098                               |
| Final R indexes [all data]                  | R <sub>1</sub> = 0.0490, wR <sub>2</sub> = 0.1122                               |
| Largest diff. peak/hole / e Å <sup>-3</sup> | 1.55/-1.34                                                                      |



**Table S18.** Bond lengths for **7**.

| <b>Atom</b> | <b>Atom</b> | <b>Length/Å</b> | <b>Atom</b> | <b>Atom</b> | <b>Length/Å</b> |
|-------------|-------------|-----------------|-------------|-------------|-----------------|
| Ni1         | N1          | 1.971(2)        | N10         | C39         | 1.137(3)        |
| Ni1         | N2          | 2.179(2)        | N8          | C29         | 1.494(3)        |
| Ni1         | N3          | 2.169(2)        | N8          | C28         | 1.511(3)        |
| Ni1         | N5          | 2.037(2)        | N8          | C38         | 1.479(3)        |
| Ni1         | N4          | 2.023(2)        | N7          | C35         | 1.495(3)        |
| Ni2         | N6          | 1.966(2)        | N7          | C36         | 1.512(3)        |
| Ni2         | N9          | 2.026(2)        | N7          | C37         | 1.486(3)        |
| Ni2         | N10         | 2.031(2)        | N5          | C20         | 1.130(4)        |
| Ni2         | N8          | 2.182(2)        | N4          | C18         | 1.135(4)        |
| Ni2         | N7          | 2.189(2)        | C2          | C1          | 1.390(4)        |
| P1          | F1          | 1.5980(17)      | C2          | C3          | 1.395(4)        |
| P1          | F4          | 1.5967(18)      | C2          | C15         | 1.505(4)        |
| P1          | F5          | 1.5866(19)      | C6          | C1          | 1.396(4)        |
| P1          | F2          | 1.5964(19)      | C6          | C5          | 1.392(4)        |
| P1          | F3          | 1.6063(18)      | C6          | C7          | 1.500(4)        |
| P1          | F6          | 1.588(2)        | C9          | C10         | 1.393(4)        |
| P4          | F24         | 1.586(2)        | C9          | C8          | 1.508(4)        |
| P4          | F23         | 1.581(2)        | C3          | C4          | 1.388(4)        |
| P4          | F19         | 1.540(3)        | C13         | C14         | 1.506(4)        |
| P4          | F22         | 1.535(3)        | C13         | C12         | 1.386(4)        |
| P4          | F21         | 1.538(3)        | C34         | C35         | 1.511(4)        |
| P4          | F20         | 1.557(3)        | C34         | C33         | 1.386(4)        |
| P3          | F13         | 1.6085(18)      | C27         | C26         | 1.391(4)        |
| P3          | F15         | 1.6010(19)      | C27         | C22         | 1.393(4)        |
| P3          | F16         | 1.5839(19)      | C27         | C28         | 1.505(4)        |
| P3          | F18         | 1.605(2)        | C26         | C25         | 1.393(4)        |
| P3          | F14         | 1.603(2)        | C23         | C22         | 1.393(4)        |
| P3          | F17         | 1.573(2)        | C23         | C24         | 1.393(4)        |
| P2          | F11         | 1.584(2)        | C23         | C36         | 1.506(4)        |
| P2          | F9          | 1.590(2)        | C30         | C29         | 1.505(3)        |
| P2          | F10         | 1.583(3)        | C30         | C31         | 1.382(4)        |
| P2          | F7          | 1.577(2)        | C5          | C4          | 1.390(4)        |
| P2          | F12         | 1.581(2)        | C41         | C42         | 1.456(4)        |
| P2          | F8          | 1.586(3)        | C39         | C40         | 1.455(4)        |
| N1          | C9          | 1.335(3)        | C18         | C19         | 1.456(4)        |
| N1          | C13         | 1.338(3)        | C25         | C24         | 1.394(4)        |

| <b>Atom</b> | <b>Atom</b> | <b>Length/Å</b> | <b>Atom</b> | <b>Atom</b> | <b>Length/Å</b> |
|-------------|-------------|-----------------|-------------|-------------|-----------------|
| N6          | C34         | 1.338(3)        | C10         | C11         | 1.385(5)        |
| N6          | C30         | 1.339(3)        | C31         | C32         | 1.389(4)        |
| N9          | C41         | 1.136(3)        | C32         | C33         | 1.385(4)        |
| N2          | C15         | 1.510(3)        | C12         | C11         | 1.384(5)        |
| N2          | C14         | 1.492(3)        | C46         | N12         | 1.136(5)        |
| N2          | C16         | 1.486(3)        | C46         | C45         | 1.428(5)        |
| N3          | C7          | 1.508(3)        | C44         | N11         | 1.145(5)        |
| N3          | C17         | 1.483(3)        | C44         | C43         | 1.452(6)        |
| N3          | C8          | 1.495(3)        | C20         | C21         | 1.461(4)        |

**Table S19.** Bond angles for **7**.

| Atom | Atom | Atom | Angle/°    | Atom | Atom | Atom | Angle/°    |
|------|------|------|------------|------|------|------|------------|
| N1   | Ni1  | N2   | 81.43(8)   | C34  | N6   | Ni2  | 119.52(18) |
| N1   | Ni1  | N3   | 81.29(9)   | C34  | N6   | C30  | 121.8(2)   |
| N1   | Ni1  | N5   | 92.98(9)   | C30  | N6   | Ni2  | 118.64(17) |
| N1   | Ni1  | N4   | 178.53(9)  | C41  | N9   | Ni2  | 174.1(2)   |
| N3   | Ni1  | N2   | 153.92(8)  | C15  | N2   | Ni1  | 109.13(15) |
| N5   | Ni1  | N2   | 100.98(9)  | C14  | N2   | Ni1  | 104.22(16) |
| N5   | Ni1  | N3   | 99.28(9)   | C14  | N2   | C15  | 110.6(2)   |
| N4   | Ni1  | N2   | 98.16(9)   | C16  | N2   | Ni1  | 115.06(17) |
| N4   | Ni1  | N3   | 98.62(9)   | C16  | N2   | C15  | 108.9(2)   |
| N4   | Ni1  | N5   | 88.49(9)   | C16  | N2   | C14  | 108.9(2)   |
| N6   | Ni2  | N9   | 90.95(8)   | C7   | N3   | Ni1  | 107.76(15) |
| N6   | Ni2  | N10  | 177.01(9)  | C17  | N3   | Ni1  | 113.28(17) |
| N6   | Ni2  | N8   | 81.17(8)   | C17  | N3   | C7   | 109.1(2)   |
| N6   | Ni2  | N7   | 81.15(8)   | C17  | N3   | C8   | 110.0(2)   |
| N9   | Ni2  | N10  | 91.78(9)   | C8   | N3   | Ni1  | 106.35(15) |
| N9   | Ni2  | N8   | 99.07(8)   | C8   | N3   | C7   | 110.3(2)   |
| N9   | Ni2  | N7   | 101.75(9)  | C39  | N10  | Ni2  | 177.2(2)   |
| N10  | Ni2  | N8   | 97.19(8)   | C29  | N8   | Ni2  | 104.56(14) |
| N10  | Ni2  | N7   | 99.47(9)   | C29  | N8   | C28  | 110.54(19) |
| N8   | Ni2  | N7   | 152.79(8)  | C28  | N8   | Ni2  | 109.32(15) |
| F1   | P1   | F3   | 179.42(11) | C38  | N8   | Ni2  | 115.69(16) |
| F4   | P1   | F1   | 89.42(10)  | C38  | N8   | C29  | 108.0(2)   |
| F4   | P1   | F3   | 90.21(10)  | C38  | N8   | C28  | 108.61(19) |
| F5   | P1   | F1   | 90.55(11)  | C35  | N7   | Ni2  | 105.38(15) |
| F5   | P1   | F4   | 90.21(12)  | C35  | N7   | C36  | 110.0(2)   |
| F5   | P1   | F2   | 88.66(12)  | C36  | N7   | Ni2  | 109.75(16) |
| F5   | P1   | F3   | 89.90(12)  | C37  | N7   | Ni2  | 114.11(17) |
| F5   | P1   | F6   | 179.06(13) | C37  | N7   | C35  | 109.0(2)   |
| F2   | P1   | F1   | 90.33(10)  | C37  | N7   | C36  | 108.6(2)   |
| F2   | P1   | F4   | 178.84(13) | C20  | N5   | Ni1  | 176.6(2)   |
| F2   | P1   | F3   | 90.04(10)  | C18  | N4   | Ni1  | 175.7(2)   |
| F6   | P1   | F1   | 90.39(11)  | C1   | C2   | C3   | 118.6(2)   |
| F6   | P1   | F4   | 89.68(13)  | C1   | C2   | C15  | 115.0(2)   |
| F6   | P1   | F2   | 91.46(14)  | C3   | C2   | C15  | 125.0(2)   |
| F6   | P1   | F3   | 89.16(12)  | C1   | C6   | C7   | 115.6(2)   |
| F23  | P4   | F24  | 178.55(16) | C5   | C6   | C1   | 118.7(2)   |

| Atom | Atom | Atom | Angle/°    | Atom | Atom | Atom | Angle/°    |
|------|------|------|------------|------|------|------|------------|
| F19  | P4   | F24  | 88.28(16)  | C5   | C6   | C7   | 124.1(2)   |
| F19  | P4   | F23  | 90.62(17)  | N1   | C9   | C10  | 120.3(3)   |
| F19  | P4   | F20  | 89.5(3)    | N1   | C9   | C8   | 114.6(2)   |
| F22  | P4   | F24  | 88.03(16)  | C10  | C9   | C8   | 125.0(3)   |
| F22  | P4   | F23  | 92.90(16)  | C2   | C1   | C6   | 121.3(2)   |
| F22  | P4   | F19  | 89.7(3)    | C4   | C3   | C2   | 119.6(2)   |
| F22  | P4   | F21  | 90.7(3)    | N1   | C13  | C14  | 114.4(2)   |
| F22  | P4   | F20  | 179.2(3)   | N1   | C13  | C12  | 120.5(3)   |
| F21  | P4   | F24  | 91.93(17)  | C12  | C13  | C14  | 125.1(2)   |
| F21  | P4   | F23  | 89.17(17)  | N6   | C34  | C35  | 114.7(2)   |
| F21  | P4   | F19  | 179.5(2)   | N6   | C34  | C33  | 120.3(2)   |
| F21  | P4   | F20  | 90.1(3)    | C33  | C34  | C35  | 124.8(2)   |
| F20  | P4   | F24  | 91.82(17)  | C26  | C27  | C22  | 118.1(2)   |
| F20  | P4   | F23  | 87.23(17)  | C26  | C27  | C28  | 125.3(2)   |
| F15  | P3   | F13  | 179.61(11) | C22  | C27  | C28  | 115.7(2)   |
| F15  | P3   | F18  | 90.54(11)  | C27  | C26  | C25  | 119.5(3)   |
| F15  | P3   | F14  | 88.67(12)  | C22  | C23  | C24  | 118.2(3)   |
| F16  | P3   | F13  | 90.04(10)  | C22  | C23  | C36  | 115.2(2)   |
| F16  | P3   | F15  | 90.24(11)  | C24  | C23  | C36  | 125.5(3)   |
| F16  | P3   | F18  | 89.32(13)  | N6   | C30  | C29  | 114.9(2)   |
| F16  | P3   | F14  | 176.71(15) | N6   | C30  | C31  | 120.7(2)   |
| F18  | P3   | F13  | 89.20(10)  | C31  | C30  | C29  | 124.3(2)   |
| F14  | P3   | F13  | 91.03(11)  | C4   | C5   | C6   | 119.5(2)   |
| F14  | P3   | F18  | 87.58(14)  | C2   | C15  | N2   | 108.4(2)   |
| F17  | P3   | F13  | 90.95(11)  | N9   | C41  | C42  | 179.6(3)   |
| F17  | P3   | F15  | 89.31(12)  | N7   | C35  | C34  | 113.2(2)   |
| F17  | P3   | F16  | 91.17(15)  | N8   | C29  | C30  | 112.5(2)   |
| F17  | P3   | F18  | 179.49(16) | N10  | C39  | C40  | 178.8(3)   |
| F17  | P3   | F14  | 91.92(15)  | C6   | C7   | N3   | 106.9(2)   |
| F11  | P2   | F9   | 91.40(13)  | C23  | C22  | C27  | 122.2(3)   |
| F11  | P2   | F8   | 88.79(16)  | N4   | C18  | C19  | 179.8(4)   |
| F10  | P2   | F11  | 90.86(16)  | C26  | C25  | C24  | 121.3(3)   |
| F10  | P2   | F9   | 90.83(16)  | C3   | C4   | C5   | 121.0(2)   |
| F10  | P2   | F8   | 179.1(2)   | C27  | C28  | N8   | 108.57(19) |
| F7   | P2   | F11  | 88.26(14)  | C11  | C10  | C9   | 118.5(3)   |
| F7   | P2   | F9   | 179.62(16) | C30  | C31  | C32  | 118.3(3)   |
| F7   | P2   | F10  | 89.02(17)  | N2   | C14  | C13  | 112.4(2)   |

| <b>Atom</b> | <b>Atom</b> | <b>Atom</b> | <b>Angle/°</b> | <b>Atom</b> | <b>Atom</b> | <b>Atom</b> | <b>Angle/°</b> |
|-------------|-------------|-------------|----------------|-------------|-------------|-------------|----------------|
| F7          | P2          | F12         | 92.87(16)      | C23         | C24         | C25         | 119.2(3)       |
| F7          | P2          | F8          | 91.80(18)      | C33         | C32         | C31         | 120.4(3)       |
| F12         | P2          | F11         | 178.72(16)     | C23         | C36         | N7          | 107.6(2)       |
| F12         | P2          | F9          | 87.47(15)      | N3          | C8          | C9          | 112.8(2)       |
| F12         | P2          | F10         | 88.56(18)      | C32         | C33         | C34         | 118.6(3)       |
| F12         | P2          | F8          | 91.78(18)      | C11         | C12         | C13         | 118.5(3)       |
| F8          | P2          | F9          | 88.34(16)      | C12         | C11         | C10         | 120.3(3)       |
| C9          | N1          | Ni1         | 119.40(17)     | N12         | C46         | C45         | 179.7(5)       |
| C9          | N1          | C13         | 121.9(2)       | N11         | C44         | C43         | 178.1(4)       |
| C13         | N1          | Ni1         | 118.33(17)     | N5          | C20         | C21         | 179.7(5)       |

## VIII. References

- 1 D. F. Evans, *J. Chem. Soc.*, 1959, 2003-2005.
- 2 J. Loliger and R. Scheffold, *J. Chem. Educ.*, 1972, **49**, 646-647.
- 3 A. W. Addison, T. N. Rao, J. Reedijk, J. van Rijn and G. C. Verschoor, *J. Chem. Soc., Dalton Trans.*, 1984, 1349-1356.
- 4 L. Yang, D. R. Powell and R. P. Houser, *Dalton Trans.*, 2007, **9**, 955-964.
- 5 C. Magallón, O. Planas, S. Roldán-Gómez, J. M. Luis, A. Company and X. Ribas, *Organometallics*, 2021, **40**, 1195-1200.
- 6 A. J. Wessel, J. W. Schultz, F. Tang, H. Duan and L. M. Mirica, *Org. Biomol. Chem.*, 2017, **15**, 9923-9931.
- 7 1998.
- 8 S. I. Ting, W. L. Williams and A. G. Doyle, *J. Am. Chem. Soc.*, 2022, **144**, 5575-5582.
- 9 W. Zhou, S. A. Zheng, J. W. Schultz, N. P. Rath and L. M. Mirica, *J. Am. Chem. Soc.*, 2016, **138**, 5777-5780.
- 10 W. Zhou, M. B. Watson, S. Zheng, N. P. Rath and L. M. Mirica, *Dalton Trans.*, 2016, **137**, 15886-15893.
- 11 W. Zhou, N. P. Rath and L. M. Mirica, *Dalton Trans.*, 2016, **45**, 8693-8695.
- 12 L. Capdevila, M. T. G. M. Derks, M. Montilla, J. M. Luis, J. Roithová and X. Ribas, *ChemistryEurope*, 2024, **2**, e202400023.
- 13 A. D. Becke, *J. Chem. Phys.*, 1993, **98**, 5648-5652.
- 14 C. T. Lee, W. T. Yang and R. G. Parr, *Phys. Rev. B: Condens. Matter Mater. Phys.*, 1988, **37**, 785-789.
- 15 F. Weigend and R. Ahlrichs, *Phys. Chem. Chem. Phys.*, 2005, **7**, 3297-3305.
- 16 F. Weigend, *Phys. Chem. Chem. Phys.*, 2006, **8**, 1057-1065.
- 17 M. J. T. Frisch, G. W.; Schlegel, H. B.; Scuseria, G. E.; Robb, M. A.; Cheeseman, J. R.; Scalmani, G.; Barone, V.; Petersson, G. A.; Nakatsuji, H.; Li, X.; Caricato, M.; Marenich, A. V.; Bloino, J.; Janesko, B. G.; Gomperts, R.; Mennucci, B.; Hratchian, H. P.; Ortiz, J. V.; Izmaylov, A. F.; Sonnenberg, J. L.; Williams-Young, D.; Ding, F.; Lipparini, F.; Egidi, F.; Goings, J.; Peng, B.; Petrone, A.; Henderson, T.; Ranasinghe, D.; Zakrzewski, V. G.; Gao, J.; Rega, N.; Zheng, G.; Liang, W.; Hada, M.; Ehara, M.; Toyota, K.; Fukuda, R.; Hasegawa, J.; Ishida, M.; Nakajima, T.; Honda, Y.; Kitao, O.; Nakai, H.; Vreven, T.; Throssell, K.; Montgomery, J. A., Jr.; Peralta, J. E.; Ogliaro, F.; Bearpark, M. J.; Heyd, J. J.; Brothers, E. N.; Kudin, K. N.; Staroverov, V. N.; Keith, T. A.; Kobayashi, R.; Normand, J.; Raghavachari, K.; Rendell, A. P.; Burant, J. C.; Iyengar, S. S.; Tomasi, J.; Cossi, M.; Millam, J. M.; Klene, M.; Adamo, C.; Cammi, R.; Ochterski, J. W.; Martin, R. L.; Morokuma, K.; Farkas, O.; Foresman, J. B.; Fox, D. J., Gaussian 16, Revision C.01, *Gaussian, Inc., Wallingford CT*, 2016.
- 18 Bruker, APEXIII. Bruker AXS, Inc., *Madison, Wisconsin, USA*, 2018.
- 19 G. Sheldrick, A short history of SHELX, *Acta Cryst. A: Found. Cryst.*, 2008, **64**, 112-122.
- 20 G. Sheldrick, SHELXT - Integrated space-group and crystal-structure determination, *Acta Cryst. Sec. A*, 2015, **71**, 3-8.
- 21 O. V. Dolomanov, L. J. Bourhis, R. J. Gildea, J. A. K. Howard and H. Puschmann, *J. Appl. Crystallogr.*, 2009, **42**, 339-341.
